# Supplementary material for: Mitochondrial dysfunction induces RNA interference in C. elegans through a pathway homologous to the mammalian RIG-I antiviral response
Source: PubMed Central journal article supplement (PMC7735679; doi:10.1371/journal.pbio.3000996), 2020-12-02

ATP5A

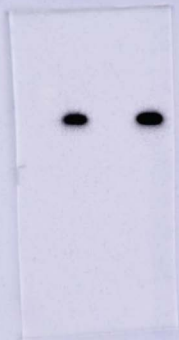

Actin

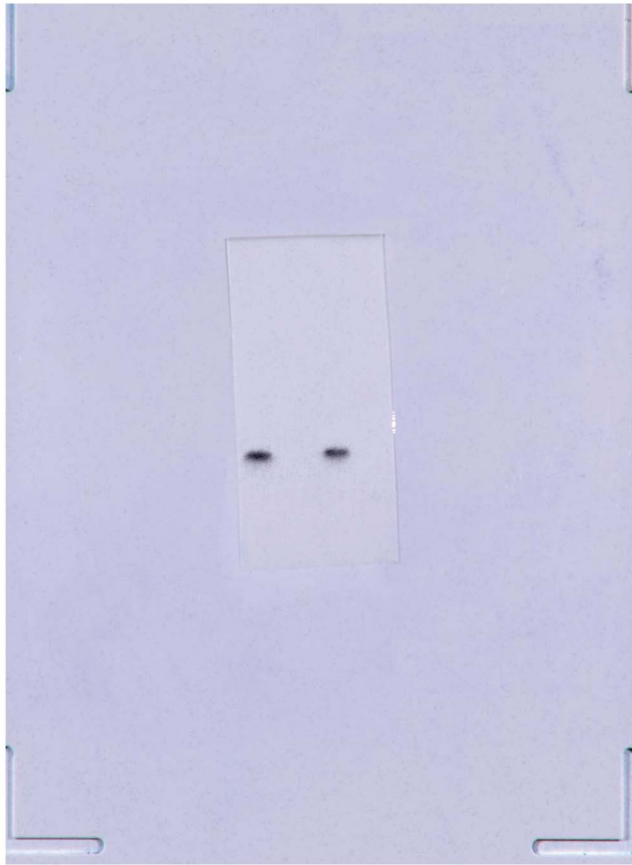

Supplement: pbio.3000996.s007.pdf [file pbio.3000996.s007.pdf]
